# Supplementary material for: Accurate Phylogenetic Relationships Among Mycobacterium bovis Strains Circulating in France Based on Whole Genome Sequencing and Single Nucleotide Polymorphism Analysis
Source: Front Microbiol. 2019 May 3;10:955. doi: 10.3389/fmicb.2019.00955 (PMC6509552; doi:10.3389/fmicb.2019.00955)
Supplement: TABLE S6 — Virulence gene without SNP. [file Table_6.XLSX]

## Sheet: Genes without SNP
Gene	Nom	Description	Gene family	seize
Mb2766c	none	POSSIBLE TRANSCRIPTIONAL REGULATORY PROTEIN	ATP-dependent proteases	340
Mb3573c	fadE29	PROBABLE ACYL-COA DEHYDROGENASE FADE29	Catabolism of cholesterol	1165
Mb3575c	cyp125	Putative cytochrome P450 125	Catabolism of cholesterol	1303
Mb0175	mce1A	MCE-FAMILY PROTEIN MCE1A	Cell Wall proteins	1366
Mb0485	hbhA	Heparin-binding hemagglutinin	Cell Wall proteins	601
Mb3531c	yrbE4A	CONSERVED HYPOTHETICAL INTEGRAL MEMBRANE PROTEIN YRBE4A	Cell Wall proteins	766
Mb3834c	fbpA	Antigen 85-A precursor	Cell Wall proteins	1018
Mb3679c	none	Putative uncharacterized protein Mb3679c	Inhibition of apoptosis	301
Mb2270	kasB	3-oxoacyl-[acyl-carrier-protein] synthase 2	Lipids and Fatty Acid Metabolism	1318
Mb2945c	ftsY	Cell division protein ftsY homolog	Lipoproteins	1270
Mb0479c	pcaA	MYCOLIC ACID SYNTHASE PCAA	Mycolic acid synthesis	865
Mb0661c	mmaA4	METHOXY MYCOLIC ACID SYNTHASE 4 MMAA4	Mycolic acid synthesis	907
Mb3111	lipR	PROBABLE ACETYL-HYDROLASE/ESTERASE LIPR	Mycolic acid synthesis	928
Mb0356	none	POSSIBLE TRANSCRIPTIONAL REGULATORY PROTEIN	Other transcriptional regulators	655
Mb0361	hspR	PROBABLE HEAT SHOCK PROTEIN TRANSCRIPTIONAL REGULATOR HSPR	Other transcriptional regulators	382
Mb0844c	phoY2	Phosphate transport system protein phoU homolog 2	Other transcriptional regulators	643
Mb3450	whiB3	TRANSCRIPTIONAL REGULATORY PROTEIN WHIB-LIKE WHIB3	Other transcriptional regulators	310
Mb2003c	nrdF1	RIBONUCLEOSIDE-DIPHOSPHATE REDUCTASE (BETA CHAIN) NRDF1	Other virulence factors	970
Mb2258	ptpA	Probable low molecular weight protein-tyrosine- phosphatase	Phagosome arresting	493
Mb2472c	ndkA	Nucleoside diphosphate kinase	Phagosome arresting	412
Mb0954c	pknDb	TRANSMEMBRANE SERINE/THREONINE-PROTEIN KINASE D PKNDb [SECOND PART](PROTEIN KINASE D)	Protein Kinases	1111
Mb1816	PE18	PE FAMILY PROTEIN	Secretion system	301
Mb3879	none	Putative uncharacterized protein Mb3879	Secretion system	400
Mb3895	none	Putative uncharacterized protein Mb3895	Secretion system	313
Mb3904	esxB	ESAT-6-like protein esxB	Secretion system	304
Mb1009	none	PROBABLE SERINE PROTEASE	Serine proteases	1396
Mb2095	sigC	Probable RNA polymerase sigma-C factor	Sigma factors	559
Mb2963	drrC	PROBABLE DAUNORUBICIN-DIM-TRANSPORT INTEGRAL MEMBRANE PROTEIN ABC TRANSPORTER DRRC	Synthesis of complex lipids	832
Mb0500	senX3	Sensor-like histidine kinase senX3	Two component system (TCS)	1234
Mb1543c	none	Putative uncharacterized protein Mb1543c	Unknown function	667
Mb2479c	none	Putative uncharacterized protein Mb2479c	Unknown function	148
