# Supplementary material for: Accurate Phylogenetic Relationships Among Mycobacterium bovis Strains Circulating in France Based on Whole Genome Sequencing and Single Nucleotide Polymorphism Analysis
Source: Front Microbiol. 2019 May 3;10:955. doi: 10.3389/fmicb.2019.00955 (PMC6509552; doi:10.3389/fmicb.2019.00955)
Supplement: TABLE S7 — The six virulence genes most frequently mutated. [file Table_7.XLSX]

## Sheet: Top genes with most SNP
Table S5: The 6 genes most frequently mutated
										Family distribution
Locus name	Accronyme	Name	Length aa	Start	End	GI	orthologous Mtb	Nb position with SNP	Nb strains	A	B	C	D	E	F	G	H	I
Mb1679c	PE_PGRS30	PE-PGRS FAMILY PROTEIN	3058	1847712	1850768	GI:31792838	rv1651c	9	39	3	3	4	1	1	9	2	0	16
Mb1689	pks7	Probable polyketide synthase pks7	6382	1860690	1867070	GI:31792848	rv1661	8	67	10	2	9	4	3	9	4	2	24
Mb1849c	PE_PGRS33	PE-PGRS FAMILY PROTEIN	1507	2051633	2053138	GI:31793008	rv1818c	14	85	11	3	9	6	3	15	6	2	30
Mb2418	PE_PGRS41	PE-PGRS FAMILY PROTEIN	1084	2660871	2661953	GI:31793574	rv2396	13	74	10	3	7	4	3	16	6	2	23
Mb2074c	pks12	Probable polyketide synthase pks12	12457	2278444	2290899	GI:31793231	rv2048c	49	45	1	1	3	0	2	5	2	1	30
Mb3043c	PPE46	PPE FAMILY PROTEIN	1315	3333554	3334867	GI:31794195	rv3018c	22	9	1	0	1	0	1	2	0	1	3
