# Supplementary material for: Accurate Phylogenetic Relationships Among Mycobacterium bovis Strains Circulating in France Based on Whole Genome Sequencing and Single Nucleotide Polymorphism Analysis
Source: Front Microbiol. 2019 May 3;10:955. doi: 10.3389/fmicb.2019.00955 (PMC6509552; doi:10.3389/fmicb.2019.00955)
Supplement: TABLE S8 — Single nucleotide polymorphism comparison to Garcia Pelayo et al. (2009) study. [file Table_8.XLSX]

## Sheet: common_snp_Pelayo-Hauer
Pelayo and al. 2009 study				Our study
Position on BCG	BCG Locus	Position on locus	SNP	AF2122 Locus	Position on locus	Position on AF2122
1057	BCG_0001	1056	a-g	Mb0001	1056	1057
4480	BCG_0004	46	t-c	Mb0004	46	4480
9217	BCG_0006	1915	c-a	Mb0006	1915	9217
10727	BCG_0007	813	g-a	Mb0007	813	10727
54954	BCG_0050c	139	g-c	Mb0020c	139	25287
57362	BCG_0053	119	c-t	Mb0023	NA	NA
71103	BCG_0069	149	t-c	Mb0039	149	41437
95526	BCG_0093	315	a-g	Mb0063	315	65857
99582	BCG_0095	1303	t-c	Mb0065	NA	NA
99751	BCG_0095	1472	g-a	Mb0065	1472	70082
120670	BCG_0116	529	t-c	Mb0086	529	90964
157153	BCG_0140c	3132	g-c	Mb0111c	3132	127447
159943	BCG_0140c	342	t-c	Mb0111c	342	130237
175711	BCG_0154c	1806	a-g	Mb0124c	NA	NA
189076	BCG_0165c	480	a-g	Mb0136c	480	159370
190241	BCG_0166c	439	t-c	Mb0137c	439	160535
191248	BCG_0167	482	c-a	Mb0138	482	161542
192205	BCG_0170	45	a-g	Mb0139-3	NA	NA
195506	BCG_0174	286	g-a	Mb0143	286	165799
196403	BCG_0175	679	a-g	Mb0144	679	166696
202798	BCG_0182	690	a-c	Mb0151	690	173091
221884	BCG_0198c	1149	a-g	Mb0167c	1149	192177
222911	BCG_0198c	122	t-c	Mb0167c	122	193204
238204	BCG_0213	853	a-g	Mb0182	853	208497
249043	BCG_0224	439	c-t	Mb0193	439	219336
256922	BCG_0231	144	g-a	Mb0200	NA	NA
261895	BCG_0233	347	g-c	Mb0202	NA	NA
263880	BCG_0234	1748	c-t	Mb0203	1748	234173
287708	BCG_0252c	1081	c-a	Mb0221c	1081	258001
288060	BCG_0252c	729	t-g	Mb0221c	729	258353
293953	BCG_0257	1209	t-c	Mb0226	1209	264246
294890	BCG_0259c	558	a-g	Mb0228c	NA	NA
299695	BCG_0264c	1175	t-c	Mb0232c	NA	NA
316982	BCG_0276	524	t-c	Mb0244	524	287276
318484	BCG_0279c	201	t-c	Mb0247c	201	288778
325225	BCG_0284	385	t-c	Mb0252	385	295519
344597	BCG_0303c	938	t-c	Mb0271c	938	314891
346099	BCG_0304c	3087	c-t	Mb0272c	3087	316393
350715	BCG_0305	1353	t-c	Mb0273	NA	NA
357249	BCG_0310c	491	a-g	Mb0278c	491	327543
388206	BCG_0333c	787	c-t	Mb0301c	787	358280
394486	BCG_0339	37	a-g	Mb0307	37	364560
394730	BCG_0339	281	t-c	Mb0307	281	364804
395949	BCG_0342	370	t-c	Mb0310	NA	NA
430587	BCG_0374c	391	t-g	Mb0340	NA	NA
459873	BCG_0393c	5620	c-t	Mb0362c	5620	430077
468278	BCG_0396	605	c-g	Mb0365	605	438482
471558	BCG_0400	874	c-t	Mb0369	874	441762
476228	BCG_0406c	1111	t-c	Mb0375c	1111	446432
479718	BCG_0410c	481	t-c	Mb0379c	481	449922
497139	BCG_0424	2915	c-t	Mb0393	2915	467343
497198	BCG_0424	2974	c-a	Mb0393	2974	467402
497736	BCG_0425c	1081	c-t	Mb0394c	NA	NA
518693	BCG_0444	779	g-t	Mb0413	779	488897
520674	BCG_0444	2760	g-a	Mb0413	2760	490878
532435	BCG_0454	472	t-c	Mb0423	472	502639
537725	BCG_0459c	62	t-c	Mb2408c	NA	NA
549208	BCG_0468c	4	t-c	Mb0437c	4	519412
550621	BCG_0471	206	a-g	Mb0440	206	520825
571367	BCG_0489c	940	t-c	Mb0458c	940	541571
586145	BCG_0505c	977	t-c	Mb0474c	977	556349
595970	BCG_0515	134	a-c	Mb0484	134	566174
622857	BCG_0544	405	c-a	Mb0513	405	593210
637014	BCG_0557	67	c-g	Mb0527	67	607367
640724	BCG_0560	1180	a-g	Mb0530	NA	NA
652034	BCG_0573	329	c-g	Mb0072	NA	NA
673893	BCG_0597	113	c-g	Mb0567	113	644245
679558	BCG_0602	131	t-c	Mb0572	131	649910
713594	BCG_0630c	1561	g-t	Mb0600c	1561	683955
714708	BCG_0630c	447	t-c	Mb0600c	447	685069
723473	BCG_0639	564	t-c	Mb0609	564	693833
730969	BCG_0649	228	g-c	Mb0619	228	701329
731026	BCG_0649	285	a-g	Mb0619	285	701386
741959	BCG_0664	68	t-c	Mb0634	68	712319
742967	BCG_0665	546	g-c	Mb0635	546	713327
752810	BCG_0676c	510	g-a	Mb0646c	NA	NA
754358	BCG_0677c	1541	c-t	Mb0647c	1541	724718
756619	BCG_0678c	2573	a-g	Mb0648c	NA	NA
834637	BCG_0754	647	t-c	Mb0724	647	804997
838241	BCG_0761	444	t-g	Mb0732	NA	NA
842349	BCG_0763	941	g-a	Mb0734	NA	NA
857644	BCG_0783	59	c-g	Mb0754	59	828003
868949	BCG_0796	1783	a-g	Mb0767	NA	NA
874233	BCG_0802c	782	a-c	Mb0773c	782	844640
876412	BCG_0804c	1325	c-a	Mb0775c	1325	846819
881416	BCG_0806c	408	g-a	Mb0777c	408	851823
895413	BCG_0822	376	g-t	Mb0793	376	865821
899708	BCG_0826c	425	g-t	Mb0797c	425	870116
950252	BCG_0879	197	t-c	Mb0849	197	920661
950344	BCG_0879	289	g-a	Mb0849	289	920753
970819	BCG_0895	925	a-c	Mb0866	NA	NA
971396	BCG_0896c	217	g-c	Mb0867c	NA	NA
973470	BCG_0898c	1231	g-a	Mb0869c	NA	NA
975853	BCG_0900	409	g-t	Mb0871	NA	NA
977773	BCG_0901	1211	t-c	Mb0874c	NA	NA
978725	BCG_0903c	250	a-c	Mb0874c	NA	NA
997980	BCG_0922c	205	t-c	Mb0894c	205	967989
1004598	BCG_0927c	157	g-a	Mb0899c	157	974604
1006321	BCG_0928c	77	c-t	Mb0900c	77	976327
1048503	BCG_0965c	698	a-g	Mb0937c	698	1018494
1078304	BCG_0992	1691	t-c	Mb0963	1691	1048294
1095292	BCG_1007c	148	t-c	Mb0978c	148	1065254
1105803	BCG_1017c	772	c-t	Mb0988c	772	1075765
1134029	BCG_1042	998	t-c	Mb1013	998	1103991
1134301	BCG_1042	1270	a-g	Mb1013	1270	1104263
1139258	BCG_1047c	403	c-t	Mb1019c	403	1109220
1143147	BCG_1051	274	g-a	Mb1023	274	1113109
1168067	BCG_1075c	479	c-t	Mb1046c	479	1138029
1169499	BCG_1077	47	t-c	Mb1048	47	1139461
1192433	BCG_1097c	525	g-t	Mb1068c	525	1162395
1196506	BCG_1101c	787	a-c	Mb1072c	787	1166468
1198468	BCG_1103	309	g-t	Mb1074	309	1168430
1202531	BCG_1106c	110	t-g	Mb1077c	110	1172493
1224131	BCG_1127c	1442	g-a	Mb1098c	1442	1194192
1236807	BCG_1138c	291	a-g	Mb1109c	291	1206868
1260159	BCG_1160	60	a-c	Mb1130	60	1230115
1267072	BCG_1169c	439	c-t	Mb1139c	439	1237028
1274762	BCG_1181c	158	g-c	Mb1151c	158	1244718
1289266	BCG_1193	526	t-c	Mb1163	526	1259222
1325742	BCG_1227	230	t-c	Mb1197	230	1295770
1369616	BCG_1256	545	c-t	Mb1228	NA	NA
1369700	BCG_1256	629	g-a	Mb1228	NA	NA
1369782	BCG_1256	711	a-c	Mb1228	NA	NA
1374460	BCG_1261c	429	g-a	Mb1233c	429	1345988
1391095	BCG_1277c	427	t-c	Mb1249c	427	1362617
1394681	BCG_1281	548	a-c	Mb1253	548	1366203
1412181	BCG_1299c	584	c-t	Mb1271c	584	1383703
1445973	BCG_1329c	400	t-c	Mb1301c	NA	NA
1466263	BCG_1345	732	t-g	Mb1317	732	1437785
1466562	BCG_1345	1031	t-c	Mb1317	1031	1438084
1488747	BCG_1367	377	c-g	Mb1339	377	1460269
1505397	BCG_1378c	236	t-c	Mb1350c	NA	NA
1526002	BCG_1392c	1072	t-c	Mb1365c	1072	1497523
1527739	BCG_1394	299	g-t	Mb1367	299	1499260
1533557	BCG_1402	288	a-g	Mb1375	288	1505078
1553217	BCG_1420	91	t-g	Mb1393	NA	NA
1557245	BCG_1421	558	a-g	Mb1394	NA	NA
1559436	BCG_1423c	712	t-g	Mb1396c	NA	NA
1569617	BCG_1432	627	a-g	Mb1405	NA	NA
1570206	BCG_1433	224	a-c	Mb1406	NA	NA
1573956	BCG_1436	964	c-g	Mb1410	964	1545475
1577790	BCG_1439c	26	t-c	Mb1413c	26	1549309
1590058	BCG_1450	497	c-g	Mb1424	497	1561577
1592162	BCG_1453	177	g-a	Mb1427	177	1563681
1621925	BCG_1483	256	t-c	Mb1457	256	1593444
1640877	BCG_1499	505	t-c	Mb1473	505	1612397
1672189	BCG_1522	128	c-t	Mb1496	NA	NA
1689358	BCG_1537c	1761	g-a	Mb1511c	1761	1661032
1716057	BCG_1564	134	c-g	Mb1538	134	1687730
1727114	BCG_1574c	2840	t-c	Mb1549c	2840	1698786
1729344	BCG_1574c	610	c-t	Mb1549c	610	1701016
1742708	BCG_1581	865	a-g	Mb1556	865	1714380
1744139	BCG_1582	425	a-g	Mb1557	425	1715811
1744702	BCG_1582	988	c-t	Mb1557	988	1716374
1765462	BCG_1601c	203	g-a	Mb1575c	NA	NA
1805768	BCG_1637	938	g-a	Mb1625	938	1785887
1844451	BCG_1672	36	g-c	Mb1660	36	1824570
1848802	BCG_1675c	138	a-g	Mb1663c	138	1828921
1883501	BCG_1700	2930	a-g	Mb1689	NA	NA
1889775	BCG_1701	2804	a-c	Mb1690	NA	NA
1902138	BCG_1709	389	a-g	Mb1698	389	1882260
1910391	BCG_1718	688	g-c	Mb1707	688	1890513
1930928	BCG_1738	128	g-c	Mb1726	128	1911052
1935567	BCG_1742c	1107	t-c	Mb1730c	1107	1915691
1948439	BCG_1754	563	a-g	Mb1743	NA	NA
1955700	BCG_1762	1142	g-a	Mb1752	1142	1935824
1958551	BCG_1766	65	a-t	Mb1756	65	1938675
1965941	BCG_1773c	235	c-t	Mb1763c	235	1946179
1974330	BCG_1782	166	a-t	Mb1772	166	1954568
1977009	BCG_1784c	143	g-a	Mb1774c	143	1957247
1982407	BCG_1787	647	c-a	Mb1777	647	1962645
1986095	BCG_1790	1314	g-c	Mb1780	1314	1966333
1990113	BCG_1793c	1637	t-c	Mb1783c	1637	1970426
2008195	BCG_1806c	577	a-g	Mb1794c	NA	NA
2013441	BCG_1811c	95	c-g	Mb1807c	95	2002894
2013772	BCG_1812c	1713	c-t	Mb1808c	1713	2003225
2018448	BCG_1814c	34	c-t	Mb1810c	34	2007901
2027778	BCG_1820	299	a-g	Mb1816	NA	NA
2028611	BCG_1821	819	g-t	Mb1817	819	2018064
2029994	BCG_1822	567	t-c	Mb1818	NA	NA
2031028	BCG_1823	122	t-c	Mb1819	122	2020481
2034007	BCG_1827	765	g-a	Mb1823	765	2023460
2050497	BCG_1840	1097	t-c	Mb1836	1097	2039950
2055309	BCG_1846c	1053	a-g	Mb1842c	1053	2044762
2065387	BCG_1854c	353	g-a	Mb1850c	353	2054840
2066058	BCG_1855	248	a-g	Mb1851	248	2055511
2075230	BCG_1864	276	t-c	Mb1860	276	2064683
2081599	BCG_1869	814	c-t	Mb1865	814	2070996
2103065	BCG_1890c	937	c-g	Mb1885c	937	2092315
2103152	BCG_1890c	850	a-g	Mb1885c	850	2092402
2105383	BCG_1892c	399	t-c	Mb1887c	NA	NA
2115697	BCG_1902	1598	t-c	Mb1897	1598	2104947
2124436	BCG_1909	303	a-g	Mb1904	303	2113686
2129804	BCG_1915	822	a-g	Mb1910	822	2119054
2148155	BCG_1939c	509	t-c	Mb1935c	509	2137405
2152208	BCG_1943	224	t-c	Mb1939	224	2141458
2157495	BCG_1948c	137	g-a	Mb1944c	NA	NA
2170478	BCG_1956c	335	a-g	Mb1952c	NA	NA
2234390	BCG_2023	3733	c-t	Mb2029	3733	2234651
2241331	BCG_2032c	394	a-g	Mb2038c	NA	NA
2241509	BCG_2032c	216	c-t	Mb2038c	NA	NA
2248474	BCG_2042c	415	t-c	Mb2048c	415	2248738
2252872	BCG_2043c	1021	c-a	Mb2046c	NA	NA
2271134	BCG_2060c	365	a-g	Mb2067c	365	2271395
2278528	BCG_2067c	12111	a-g	Mb2074c	NA	NA
2278555	BCG_2067c	12084	a-g	Mb2074c	NA	NA
2281355	BCG_2067c	9284	g-a	Mb2074c	9284	2281616
2281845	BCG_2067c	8794	t-c	Mb2074c	8794	2282106
2329195	BCG_2110	253	t-c	Mb2117	NA	NA
2334971	BCG_2115c	800	a-g	Mb2122c	800	2335359
2353499	BCG_2130	832	t-c	Mb2137	832	2353887
2373525	BCG_2149	104	c-t	Mb2156	104	2373913
2376638	BCG_2153c	211	c-a	Mb2160c	211	2377026
2378832	BCG_2156	102	c-t	Mb2163	102	2379220
2382512	BCG_2159c	9	g-a	Mb2166c	9	2383016
2423483	BCG_2197c	378	c-a	Mb2204c	378	2423986
2457641	BCG_2229	659	t-c	Mb2236	659	2458144
2473125	BCG_2240c	919	c-a	Mb2247c	919	2473628
2477567	BCG_2243	91	a-g	Mb2250	91	2478070
2488289	BCG_2254	155	a-g	Mb2261	155	2488792
2492108	BCG_2258	924	c-g	Mb2265	924	2492611
2495035	BCG_2259	1086	g-a	Mb2266	1086	2495538
2501286	BCG_2265	369	a-c	Mb2272	NA	NA
2508888	BCG_2275c	495	c-a	Mb2281c	495	2509390
2515663	BCG_2281c	1140	c-g	Mb2287c	1140	2516165
2523604	BCG_2287	454	t-c	Mb2293	454	2524106
2524500	BCG_2289	311	g-c	Mb2295	311	2525002
2528045	BCG_2294c	431	g-a	Mb2300c	431	2528547
2579279	BCG_2350c	1278	c-g	Mb2356c	1278	2579779
2581029	BCG_2351c	289	a-c	Mb2357c	289	2581529
2595341	BCG_2363c	665	c-g	Mb2369c	665	2595841
2597785	BCG_2366c	1765	c-g	Mb2372c	1765	2598285
2608131	BCG_2375c	360	a-g	Mb2382c	360	2611180
2609053	BCG_2376c	228	g-a	Mb2383c	228	2612102
2637103	BCG_2397c	3757	t-g	Mb2404c	3757	2640152
2649191	BCG_2404c	98	g-a	Mb2411c	98	2652240
2660083	BCG_2413c	791	t-c	Mb2420c	791	2663078
2680314	BCG_2432c	226	c-t	Mb2439c	226	2683310
2682495	BCG_2435c	494	a-g	Mb2442c	494	2685491
2726188	BCG_2479	164	a-g	Mb2486	164	2729181
2733012	BCG_2485c	318	c-t	Mb2492c	318	2736005
2742051	BCG_2494c	89	a-g	Mb2501c	89	2745044
2751357	BCG_2500c	1736	c-t	Mb2507c	1736	2754350
2760129	BCG_2506c	1064	a-g	Mb2513c	NA	NA
2801843	BCG_2542	363	a-g	Mb2550	363	2804844
2815693	BCG_2549c	775	g-c	Mb2557c	775	2818694
2816951	BCG_2550	280	a-g	Mb2558	280	2819952
2821431	BCG_2553c	147	a-g	Mb2560c	147	2824432
2851765	BCG_2588	942	g-t	Mb2595	942	2854766
2855116	BCG_2590	873	t-c	Mb2597	873	2858117
2863212	BCG_2596	722	t-c	Mb2603	NA	NA
2865615	BCG_2600	250	a-g	Mb2607	250	2868616
2868371	BCG_2602	285	a-g	Mb2610	285	2871372
2878706	BCG_2610c	1478	c-t	Mb2618c	1478	2881707
2884117	BCG_2613	1799	a-g	Mb2621	1799	2887118
2885633	BCG_2613	3315	a-g	Mb2621	3315	2888634
2893103	BCG_2625	269	a-g	Mb2632	269	2896114
2917346	BCG_2653c	93	a-g	Mb2659c	93	2920364
2919705	BCG_2655	202	g-c	Mb266	NA	NA
2926397	BCG_2661c	555	g-a	Mb2667c	NA	NA
2935563	BCG_2675	182	a-g	Mb2681	182	2938515
2937775	BCG_2680	351	g-a	Mb2484c	NA	NA
2956844	BCG_2698	1176	t-g	Mb2704	1176	2959795
2976217	BCG_2723	71	a-g	Mb2729	71	2979168
2976793	BCG_2723	647	t-g	Mb2729	647	2979744
2987329	BCG_2734c	976	t-c	Mb2740c	976	2990280
2990880	BCG_2737c	97	c-g	Mb2743c	97	2993831
2998549	BCG_2745c	126	t-c	Mb2751c	126	3001500
3011056	BCG_2760c	457	g-t	Mb2765c	457	3014181
3028471	BCG_2782	386	g-t	Mb2787	386	3031596
3033079	BCG_2787c	828	a-c	Mb2792c	828	3036204
3033283	BCG_2787c	624	a-g	Mb2792c	624	3036408
3035377	BCG_2790c	414	t-g	Mb2795c	414	3038502
3055373	IS1602	1750	c-t	Mb2814c	NA	NA
3055561	IS1602	1938	a-g	Mb2815c	NA	NA
3060528	BCG_2815c	228	a-g	Mb2820c	228	3063629
3068151	BCG_2825	1045	t-c	Mb2830	1045	3071255
3086534	BCG_2843c	167	g-t	Mb2848c	167	3089119
3091935	BCG_2851	678	t-c	Mb2855	678	3094520
3093642	BCG_2853c	829	g-c	Mb2857c	829	3096227
3096358	BCG_2856c	1257	t-c	Mb2861c	1257	3098942
3116804	BCG_2873	550	g-a	Mb2878	NA	NA
3130475	BCG_2886c	723	a-g	Mb2889c	723	3133059
3133346	BCG_2890c	1118	g-t	Mb2893c	1118	3135930
3141896	BCG_2898	301	g-a	Mb2901	301	3144480
3157452	BCG_2915c	771	a-g	Mb2918c	771	3160036
3166572	BCG_2923c	317	t-c	Mb2926c	317	3169156
3175511	BCG_2934c	120	a-g	Mb2937c	120	3178095
3183945	BCG_2939c	668	c-a	Mb2942c	668	3186529
3184796	BCG_2940c	213	a-g	Mb2943c	213	3187380
3237328	BCG_2963	4	t-g	Mb2966	4	3239912
3240555	BCG_2964	1496	t-c	Mb2967	1496	3243139
3263242	BCG_2977	413	a-g	Mb2980	413	3265769
3284092	BCG_2995c	17	t-g	Mb2998c	17	3286619
3301557	BCG_3011c	650	t-g	Mb3014c	650	3303630
3331758	BCG_3040c	982	c-g	Mb3043c	NA	NA
3351386	BCG_3060c	188	c-t	Mb3062c	188	3353514
3364616	BCG_3073c	900	a-g	Mb3075c	900	3366744
3374039	BCG_3084	129	a-g	Mb3085	129	3376167
3420489	BCG_3122c	1089	a-g	Mb3124c	1089	3422550
3431976	BCG_3133	429	g-a	Mb3135	NA	NA
3433105	BCG_3134	969	g-a	Mb3136	NA	NA
3445395	BCG_3151c	497	c-a	Mb3152c	497	3447457
3458011	BCG_3161	769	c-t	Mb3162	769	3460073
3462195	BCG_3165c	399	c-a	Mb3166c	399	3464257
3465129	BCG_3169	5	c-a	Mb3170	5	3467191
3476170	BCG_3179	889	a-t	Mb3180	889	3478232
3478362	BCG_3180	1183	a-g	Mb3181	1183	3480424
3480033	BCG_3181	1196	t-a	Mb3182	1196	3482095
3487083	BCG_3187c	1023	t-g	Mb3188c	1023	3489142
3489940	BCG_3190c	604	a-c	Mb3191c	604	3491999
3491486	BCG_3192	192	c-t	Mb3193	192	3493545
3540328	BCG_3238	49	c-t	Mb3237	49	3542388
3542548	BCG_3239	673	a-g	Mb3238	673	3544608
3556307	BCG_3257	448	a-g	Mb3256	448	3558424
3561008	BCG_3261c	348	a-g	Mb3260c	348	3563125
3567487	BCG_3268c	2600	t-c	Mb3267c	2600	3569604
3574429	BCG_3271c	266	a-g	Mb3270c	266	3576546
3575855	BCG_3273c	1539	g-c	Mb3272c	1539	3577972
3606693	BCG_3301	774	g-a	Mb3300	774	3608810
3617844	BCG_3312	508	a-g	Mb3311	508	3619961
3619601	BCG_3314	836	t-c	Mb3313	836	3621718
3639155	BCG_3329c	154	t-c	Mb3328c	154	3641272
3697459	BCG_3388c	165	a-g	Mb3351c	165	3663410
3707197	BCG_3400	122	a-g	Mb3363	122	3673148
3737488	BCG_3417c	3265	a-g	Mb3380c	3265	3703453
3739052	BCG_3417c	1701	t-c	Mb3380c	1701	3705017
3749424	BCG_3421c	3878	a-g	Mb3384c	NA	NA
3753176	BCG_3421c	126	c-g	Mb3384c	NA	NA
3758967	BCG_3431	68	g-t	Mb3394	68	3724938
3762365	BCG_3436c	65	g-a	Mb3399c	65	3728336
3770725	BCG_3442c	1580	t-c	Mb3405c	1580	3736801
3780402	BCG_3449c	410	a-g	Mb3412c	NA	NA
3790541	BCG_3458c	515	a-g	Mb3421c	515	3756614
3806278	BCG_3471	1972	a-g	Mb3434	1972	3772351
3807934	BCG_3472c	460	a-g	Mb3436c	460	3774060
3829684	BCG_3496c	698	t-c	Mb3460c	NA	NA
3834925	BCG_3500c	577	t-c	Mb3464c	577	3801054
3846336	BCG_3513c	3475	t-c	Mb3477c	3475	3812465
3850717	BCG_3514	793	a-c	Mb3478	793	3816846
3870444	BCG_3536c	465	c-g	Mb3500c	465	3836573
3874378	BCG_3540	76	t-c	Mb3504	76	3840507
3896318	BCG_3561c	136	t-g	Mb3527c	136	3862444
3901001	BCG_3566c	537	g-c	Mb3532c	537	3867127
3903893	BCG_3569	698	a-g	Mb3535	698	3870019
3988562	BCG_3633c	530	c-t	Mb3599c	530	3952885
4000754	BCG_3644c	532	t-c	Mb3610c	532	3965078
4003658	BCG_3647c	274	c-t	Mb3613c	274	3967982
4009147	BCG_3653c	236	g-a	Mb3619c	236	3973474
4013869	BCG_3658	629	a-g	Mb3624	629	3978196
4026907	BCG_3669c	189	a-g	Mb3635c	189	3991234
4034832	BCG_3680c	458	g-a	Mb3646c	458	3999048
4036595	BCG_3682c	331	t-c	Mb3648c	331	4000811
4049672	IS1534	985	t-c	Mb3661	NA	NA
4069698	BCG_3716c	354	a-g	Mb3682c	354	4033932
4078846	BCG_3724c	1352	c-t	Mb3690c	1352	4043080
4108543	BCG_3752	704	t-c	Mb3718	NA	NA
4112090	BCG_3755c	782	g-c	Mb3721c	NA	NA
4113614	BCG_3757	5	c-a	Mb3724	5	4077846
4160427	BCG_3796	225	g-a	Mb3763	225	4124319
4162623	BCG_3797	1356	a-c	Mb3764	1356	4126515
4180797	BCG_3821c	482	c-a	Mb3788c	482	4144689
4194250	BCG_3838	758	t-c	Mb3805	758	4158142
4212682	BCG_3855	416	a-g	Mb3822	416	4176574
4219576	BCG_3857	659	g-a	Mb3824	659	4183468
4231601	BCG_3862c	1949	c-t	Mb3830c	1949	4195471
4253914	BCG_3878c	61	a-g	Mb3846c	61	4217784
4269522	BCG_3888c	2486	a-c	Mb3855c	2486	4233393
4277479	BCG_3893c	609	a-g	Mb3860c	NA	NA
4281683	BCG_3898	234	a-t	Mb3865	234	4245554
4338055	BCG_3948c	618	c-t	Mb3921c	618	4309023
4357256	BCG_3966	73	c-g	Mb3939	73	4328226
4363654	BCG_3968	477	t-g	Mb3941	477	4334624
